# Supplementary material for: Research on the Mechanism of Electrical Resistance Changes in CO2 Utilization and Storage Processes
Source: Research Square preprint supplement (doi:10.21203/rs.3.rs-6286998/v1), 2025-04-25
Supplement: Supplementary file 1 [file 52b221b45fee6643ea6f3fdc.xlsx]

## Sheet: 去离子水
测量地层水饱和非导体管稳定时在不同温度压力下的电阻				假岩心	外径/cm	2.494
					内径/cm	1.012
					长度/cm	5.022
温度：26℃ 压力：5Mpa
时间	泵位	入口压力/MPa	出口压力/MPa	回压/MPa	围压/MPa	电阻/Ω	电阻率/Ω·m
03:09:44	383.793	5.06	5.04	4.65	10.03	573939	918.798
03:10:44	383.593	5.06	5.04	4.65	10.03	575593	921.445
03:11:44	383.393	5.06	5.04	4.65	10.03	576784	923.353
03:12:44	383.193	5.06	5.04	4.65	10.03	578160	925.554
03:13:44	382.993	5.06	5.04	4.65	10.03	579004	926.905
03:14:44	382.793	5.06	5.04	4.65	10.03	580223	928.858
03:15:44	382.593	5.06	5.04	4.65	10.03	581339	930.644
03:16:44	382.393	5.06	5.04	4.65	10.03	582000	931.702
03:17:44	382.193	5.06	5.04	4.65	10.03	582762	932.922
03:18:44	381.993	5.06	5.04	4.65	10.03	583697	934.418
温度：26℃ 压力：7Mpa							927.46
时间	泵位	入口压力/MPa	出口压力/MPa	回压/MPa	围压/MPa	电阻/Ω	电阻率/Ω·m
03:39:44	338.07	7.02	7	6.7	10.03	590447	945.224
03:40:44	337.87	7.02	7	6.7	10.03	591908	947.564
03:41:44	337.67	7.02	7	6.7	10.03	593145	949.544
03:42:44	337.47	7.02	7	6.7	10.03	593901	950.753
03:43:44	337.27	7.02	7	6.7	10.03	594606	951.883
03:44:44	337.07	7.02	7	6.7	10.03	595138	952.733
03:45:44	336.87	7.02	7	6.7	10.03	594084	951.047
03:46:44	336.67	7.02	7	6.7	10.03	593285	949.768
03:47:44	336.47	7.02	7	6.7	10.03	592716	948.856
03:48:44	336.27	7.02	7	6.7	10.03	592163	947.971
温度：26℃ 压力：7.5Mpa							949.534
时间	泵位	入口压力/MPa	出口压力/MPa	回压/MPa	围压/MPa	电阻/Ω	电阻率/Ω·m
04:06:44	372.39	7.53	7.52	7.2	10.49	601965	963.664
04:07:44	372.19	7.53	7.52	7.2	10.49	602360	964.296
04:08:44	371.99	7.53	7.52	7.2	10.49	602604	964.687
04:09:44	371.79	7.53	7.52	7.2	10.49	603028	965.364
04:10:44	371.59	7.53	7.52	7.2	10.49	603461	966.059
04:11:44	371.39	7.53	7.52	7.2	10.49	603572	966.235
04:12:44	371.19	7.53	7.52	7.2	10.49	604390	967.545
04:13:44	370.99	7.53	7.52	7.2	10.49	604260	967.337
04:14:44	370.79	7.53	7.52	7.2	10.49	604776	968.163
04:15:44	370.59	7.53	7.52	7.2	10.49	605238	968.903
温度：26℃ 压力：12Mpa							966.225
时间	泵位	入口压力/MPa	出口压力/MPa	回压/MPa	围压/MPa	电阻/Ω	电阻率/Ω·m
04:33:44	370.774	12.07	12.09	11.7	15.04	578291	925.765
04:34:44	370.174	12.07	12.09	11.7	15.04	578224	925.658
04:35:44	369.574	12.07	12.09	11.7	15.04	579502	927.703
04:36:44	368.974	12.07	12.09	11.7	15.04	582034	931.757
04:37:44	368.374	12.07	12.09	11.7	15.04	584148	935.14
04:38:44	367.774	12.07	12.09	11.7	15.04	585378	937.11
04:39:44	367.174	12.07	12.09	11.7	15.04	587142	939.933
04:40:44	366.574	12.07	12.09	11.7	15.04	588724	942.466
04:41:44	365.974	12.07	12.09	11.7	15.04	590699	945.628
04:42:44	365.374	12.07	12.09	11.7	15.04	593234	949.685
温度：26℃ 压力：20Mpa							936.085
时间	泵位	入口压力/MPa	出口压力/MPa	回压/MPa	围压/MPa	电阻/Ω	电阻率/Ω·m
05:10:44	358.8	20.07	20	19.6	23.1	583539	934.166
05:11:44	358.6	20.07	20	19.6	23.1	582717	932.849
05:12:44	358.4	20.07	20	19.6	23.1	581411	930.758
05:13:44	358.2	20.07	20	19.6	23.1	580776	929.742
05:14:44	358	20.07	20	19.6	23.1	579220	927.251
05:15:44	357.8	20.07	20	19.6	23.1	577829	925.025
05:16:44	357.6	20.07	20	19.6	23.1	577007	923.709
05:17:44	357.4	20.07	20	19.6	23.1	582237	932.082
05:18:44	357.2	20.07	20	19.6	23.1	583846	934.656
05:19:44	357	20.07	20	19.6	23.1	584484	935.679
							930.592
温度：31℃ 压力：5Mpa
时间	泵位	入口压力/MPa	出口压力/MPa	回压/MPa	围压/MPa	电阻/Ω	电阻率/Ω·m
06:34:44	343.167	5	4.94	4.7	8.04	566486	906.865
06:35:44	342.967	5	4.94	4.7	8.04	566211	906.426
06:36:44	342.767	5	4.94	4.7	8.04	565609	905.462
06:37:44	342.567	5	4.94	4.7	8.04	565104	904.654
06:38:44	342.367	5	4.94	4.7	8.04	566002	906.091
06:39:44	342.167	5	4.94	4.7	8.04	564389	903.51						温度	压力	电阻率
06:40:44	341.967	5	4.94	4.7	8.04	564115	903.071						26	5	950.68
06:41:44	341.767	5	4.94	4.7	8.04	563724	902.445							7	941.79
06:42:44	341.567	5	4.94	4.7	8.04	563798	902.563							7.5	932.11
06:43:44	341.367	5	4.94	4.7	8.04	563116	901.471							12	929.46
温度：31℃ 压力：7Mpa							904.256							20	925.23
													31	5	904.256
时间	泵位	入口压力/MPa	出口压力/MPa	回压/MPa	围压/MPa	电阻/Ω	电阻率/Ω·m							7	885.983
06:57:44	337.02	7.01	7	6.7	10.04	551178	882.361							7.5	882.191
06:58:44	337	7.01	7	6.7	10.04	551547	882.951							12	870.36
06:59:44	336.98	7.01	7	6.7	10.04	552104	883.843							20	848.117
07:00:44	336.96	7.01	7	6.7	10.04	553035	885.333						35	5	882.989
07:01:44	336.94	7.01	7	6.7	10.04	553426	885.958							7	874.071
07:02:44	336.92	7.01	7	6.7	10.04	554772	888.114							7.5	872.995
07:03:44	336.9	7.01	7	6.7	10.04	553909	886.732							12	860.394
07:04:44	336.88	7.01	7	6.7	10.04	554406	887.527							20	823.029
07:05:44	336.86	7.01	7	6.7	10.04	555202	888.802						50	5	634.722
07:06:44	336.84	7.01	7	6.7	10.04	554829	888.204							7	611.607
温度：31℃ 压力：7.5Mpa							885.983							7.5	599.896
														12	593.123
时间	泵位	入口压力/MPa	出口压力/MPa	回压/MPa	围压/MPa	电阻/Ω	电阻率/Ω·m							20	589.565
07:20:44	334.196	7.52	7.51	7.2	10.48	550952	881.998						70	5	426.575
07:21:44	334.016	7.52	7.51	7.2	10.48	551180	882.364							7	398.296
07:22:44	333.836	7.52	7.51	7.2	10.48	551245	882.468							7.5	388.74
07:23:44	333.656	7.52	7.51	7.2	10.48	551193	882.385							12	376.891
07:24:44	333.476	7.52	7.51	7.2	10.48	551213	882.416							20	375.765
07:25:44	333.296	7.52	7.51	7.2	10.48	551157	882.326
07:26:44	333.116	7.52	7.51	7.2	10.48	550950	881.994
07:27:44	332.936	7.52	7.51	7.2	10.48	551034	882.129
07:28:44	332.756	7.52	7.51	7.2	10.48	551029	882.122
07:29:44	332.576	7.52	7.51	7.2	10.48	550772	881.711
温度：31℃ 压力：12Mpa							882.191
时间	泵位	入口压力/MPa	出口压力/MPa	回压/MPa	围压/MPa	电阻/Ω	电阻率/Ω·m
07:53:44	327.504	12.06	12.08	11.7	15.03	524236	839.229
07:54:44	327.304	12.06	12.08	11.7	15.03	529818	848.166
07:55:44	327.104	12.06	12.08	11.7	15.03	531372	850.654
07:56:44	326.904	12.06	12.08	11.7	15.03	532726	852.821
07:57:44	326.704	12.06	12.08	11.7	15.03	535273	856.899
07:58:44	326.504	12.06	12.08	11.7	15.03	534328	855.385
07:59:44	326.304	12.06	12.08	11.7	15.03	534738	856.042
08:00:44	326.104	12.06	12.08	11.7	15.03	534878	856.266
08:01:44	325.904	12.06	12.08	11.7	15.03	535196	856.774
08:02:44	325.704	12.06	12.08	11.7	15.03	537203	859.988
温度：31℃ 压力：20Mpa							853.222
时间	泵位	入口压力/MPa	出口压力/MPa	回压/MPa	围压/MPa	电阻/Ω	电阻率/Ω·m
09:00:44	311.76	20.04	20.12	19.6	23.1	528629	846.262
09:01:44	311.56	20.04	20.12	19.6	23.1	528748	846.452
09:02:44	311.36	20.04	20.12	19.6	23.1	529283	847.309
09:03:44	311.16	20.04	20.12	19.6	23.1	529514	847.679
09:04:44	310.96	20.04	20.12	19.6	23.1	529868	848.246
09:05:44	310.76	20.04	20.12	19.6	23.1	530084	848.591
09:06:44	310.56	20.04	20.12	19.6	23.1	530183	848.75
09:07:44	310.36	20.04	20.12	19.6	23.1	530313	848.957
09:08:44	310.16	20.04	20.12	19.6	23.1	530425	849.137
09:09:44	309.96	20.04	20.12	19.6	23.1	530828	849.783
							848.117
温度：35℃ 压力：5Mpa
时间	泵位	入口压力/MPa	出口压力/MPa	回压/MPa	围压/MPa	电阻/Ω	电阻率/Ω·m
10:16:44	298.128	4.96	4.93	4.7	8.04	552253	884.081
10:17:44	297.928	4.96	4.93	4.7	8.04	552262	884.095
10:18:44	297.728	4.96	4.93	4.7	8.04	551826	883.397
10:19:44	297.528	4.96	4.93	4.7	8.04	551539	882.938
10:20:44	297.328	4.96	4.93	4.7	8.04	551547	882.951
10:21:44	297.128	4.96	4.93	4.7	8.04	551332	882.606
10:22:44	296.928	4.96	4.93	4.7	8.04	551884	883.491
10:23:44	296.728	4.96	4.93	4.7	8.04	551735	883.252
10:24:44	296.528	4.96	4.93	4.7	8.04	550729	881.642
10:25:44	296.328	4.96	4.93	4.7	8.04	550600	881.434
温度：35℃ 压力：7Mpa							882.989
时间	泵位	入口压力/MPa	出口压力/MPa	回压/MPa	围压/MPa	电阻/Ω	电阻率/Ω·m
10:37:44	294.302	6.99	6.97	6.97	10.03	543949	870.788
10:38:44	294.102	6.99	6.97	6.97	10.03	545020	872.502
10:39:44	293.902	6.99	6.97	6.97	10.03	546091	874.216
10:40:44	293.702	6.99	6.97	6.97	10.03	547162	875.93
10:41:44	293.502	6.99	6.97	6.97	10.03	547222	876.028
10:42:44	293.302	6.99	6.97	6.97	10.03	543303	869.753
10:43:44	293.102	6.99	6.97	6.97	10.03	542374	868.266
10:44:44	292.902	6.99	6.97	6.97	10.03	547145	875.903
10:45:44	292.702	6.99	6.97	6.97	10.03	554152	887.12
10:46:44	292.502	6.99	6.97	6.97	10.03	543586	870.207
温度：35℃ 压力：7.5Mpa							874.071
时间	泵位	入口压力/MPa	出口压力/MPa	回压/MPa	围压/MPa	电阻/Ω	电阻率/Ω·m
11:01:44	289.602	7.5	7.49	7.2	10.44	553876	886.679
11:02:44	289.402	7.5	7.49	7.2	10.44	552154	883.923
11:03:44	289.202	7.5	7.49	7.2	10.44	540233	864.839
11:04:44	289.002	7.5	7.49	7.2	10.44	544998	872.467
11:05:44	288.802	7.5	7.49	7.2	10.44	542790	868.932
11:06:44	288.602	7.5	7.49	7.2	10.44	541012	866.087
11:07:44	288.402	7.5	7.49	7.2	10.44	549948	880.391
11:08:44	288.202	7.5	7.49	7.2	10.44	545627	873.474
11:09:44	288.002	7.5	7.49	7.2	10.44	541136	866.284
11:10:44	287.802	7.5	7.49	7.2	10.44	541504	866.874
温度：35℃ 压力：12Mpa							872.995
时间	泵位	入口压力/MPa	出口压力/MPa	回压/MPa	围压/MPa	电阻/Ω	电阻率/Ω·m
11:46:44	277.458	12.05	12.07	14.1	15.04	541994	867.658
11:47:44	277.258	12.05	12.07	14.1	15.04	540872	865.862
11:48:44	277.058	12.05	12.07	14.1	15.04	539851	864.227
11:49:44	276.858	12.05	12.07	14.1	15.04	536629	859.069
11:50:44	276.658	12.05	12.07	14.1	15.04	538507	862.076
11:51:44	276.458	12.05	12.07	14.1	15.04	536986	859.64
11:52:44	276.258	12.05	12.07	14.1	15.04	535864	857.844
11:53:44	276.058	12.05	12.07	14.1	15.04	534942	856.369
11:54:44	275.858	12.05	12.07	14.1	15.04	534020	854.893
11:55:44	275.658	12.05	12.07	14.1	15.04	534899	856.299
温度：35℃ 压力：20Mpa							860.394
时间	泵位	入口压力/MPa	出口压力/MPa	回压/MPa	围压/MPa	电阻/Ω	电阻率/Ω·m
12:28:44	266.998	20.05	20.1	19.6	23	514218	823.193
12:29:44	266.798	20.05	20.1	19.6	23	513440	821.947
12:30:44	266.598	20.05	20.1	19.6	23	514662	823.903
12:31:44	266.398	20.05	20.1	19.6	23	514884	824.258
12:32:44	266.198	20.05	20.1	19.6	23	514105	823.012
12:33:44	265.998	20.05	20.1	19.6	23	514327	823.367
12:34:44	265.798	20.05	20.1	19.6	23	514549	823.722
12:35:44	265.598	20.05	20.1	19.6	23	513771	822.476
12:36:44	265.398	20.05	20.1	19.6	23	513992	822.831
12:37:44	265.198	20.05	20.1	19.6	23	513214	821.585
							823.029
温度：50℃ 压力：5Mpa
时间	泵位	入口压力/MPa	出口压力/MPa	回压/MPa	围压/MPa	电阻/Ω	电阻率/Ω·m
14:37:11	242.04	5.06	5.03	4.8	8.03	397578	636.467
14:38:11	241.84	5.06	5.03	4.8	8.03	397425	636.222
14:39:11	241.64	5.06	5.03	4.8	8.03	397340	636.087
14:40:11	241.44	5.06	5.03	4.8	8.03	396969	635.493
14:41:11	241.24	5.06	5.03	4.8	8.03	396697	635.057
14:42:11	241.04	5.06	5.03	4.8	8.03	396419	634.612
14:43:11	240.84	5.06	5.03	4.8	8.03	396067	634.048
14:44:11	240.64	5.06	5.03	4.8	8.03	395870	633.734
14:45:11	240.44	5.06	5.03	4.8	8.03	395387	632.96
14:46:11	240.24	5.06	5.03	4.8	8.03	395123	632.538
温度：50℃ 压力：7Mpa							634.722
时间	泵位	入口压力/MPa	出口压力/MPa	回压/MPa	围压/MPa	电阻/Ω	电阻率/Ω·m
15:11:11	235.262	7.01	6.98	6.7	10.03	384114	614.914
15:12:11	235.062	7.01	6.98	6.7	10.03	383702	614.254
15:13:11	234.862	7.01	6.98	6.7	10.03	383190	613.435
15:14:11	234.662	7.01	6.98	6.7	10.03	382940	613.034
15:15:11	234.462	7.01	6.98	6.7	10.03	382316	612.035
15:16:11	234.262	7.01	6.98	6.7	10.03	381850	611.289
15:17:11	234.062	7.01	6.98	6.7	10.03	381304	610.415
15:18:11	233.862	7.01	6.98	6.7	10.03	380617	609.316
15:19:11	233.662	7.01	6.98	6.7	10.03	380427	609.012
15:20:11	233.462	7.01	6.98	6.7	10.03	380028	608.372
温度：50℃ 压力：7.5Mpa							611.607
时间	泵位	入口压力/MPa	出口压力/MPa	回压/MPa	围压/MPa	电阻/Ω	电阻率/Ω·m
15:52:11	227.185	7.49	7.48	7.2	10.43	375015	600.348
15:53:11	226.985	7.49	7.48	7.2	10.43	374832	600.054
15:54:11	226.785	7.49	7.48	7.2	10.43	375514	601.146
15:55:11	226.585	7.49	7.48	7.2	10.43	374797	599.999
15:56:11	226.385	7.49	7.48	7.2	10.43	374622	599.719
15:57:11	226.185	7.49	7.48	7.2	10.43	374625	599.723
15:58:11	225.985	7.49	7.48	7.2	10.43	374664	599.785
15:59:11	225.785	7.49	7.48	7.2	10.43	374562	599.622
16:00:11	225.585	7.49	7.48	7.2	10.43	374331	599.253
16:01:11	225.385	7.49	7.48	7.2	10.43	374370	599.315
温度：50℃ 压力：12Mpa							599.896
时间	泵位	入口压力/MPa	出口压力/MPa	回压/MPa	围压/MPa	电阻/Ω	电阻率/Ω·m
16:22:11	220.448	12.05	12.07	11.7	15.02	366819	587.227
16:23:11	220.248	12.05	12.07	11.7	15.02	367877	588.92
16:24:11	220.048	12.05	12.07	11.7	15.02	369152	590.962
16:25:11	219.848	12.05	12.07	11.7	15.02	370381	592.928
16:26:11	219.648	12.05	12.07	11.7	15.02	371102	594.083
16:27:11	219.448	12.05	12.07	11.7	15.02	371415	594.584
16:28:11	219.248	12.05	12.07	11.7	15.02	371713	595.061
16:29:11	219.048	12.05	12.07	11.7	15.02	371853	595.285
16:30:11	218.848	12.05	12.07	11.7	15.02	372315	596.025
16:31:11	218.648	12.05	12.07	11.7	15.02	372399	596.16
温度：50℃ 压力：20Mpa							593.123
时间	泵位	入口压力/MPa	出口压力/MPa	回压/MPa	围压/MPa	电阻/Ω	电阻率/Ω·m
17:17:11	207.236	20.09	20.07	19.7	23.1	368013	589.138
17:18:11	207.036	20.09	20.07	19.7	23.1	367855	588.885
17:19:11	206.836	20.09	20.07	19.7	23.1	367959	589.051
17:20:11	206.636	20.09	20.07	19.7	23.1	367890	588.941
17:21:11	206.436	20.09	20.07	19.7	23.1	368168	589.386
17:22:11	206.236	20.09	20.07	19.7	23.1	368160	589.373
17:23:11	206.036	20.09	20.07	19.7	23.1	368447	589.832
17:24:11	205.836	20.09	20.07	19.7	23.1	368578	590.043
17:25:11	205.636	20.09	20.07	19.7	23.1	368969	590.669
17:26:11	205.436	20.09	20.07	19.7	23.1	368762	590.337
温度：70℃ 压力：5Mpa							589.565
时间	泵位	入口压力/MPa	出口压力/MPa	回压/MPa	围压/MPa	电阻/Ω	电阻率/Ω·m
19:38:11	176.68	4.96	4.94	4.7	8.04	271421	434.507
19:39:11	176.48	4.96	4.94	4.7	8.04	264921	424.102
19:40:11	176.28	4.96	4.94	4.7	8.04	264409	423.283
19:41:11	176.08	4.96	4.94	4.7	8.04	271945	435.347
19:42:11	175.88	4.96	4.94	4.7	8.04	278747	446.236
19:43:11	175.68	4.96	4.94	4.7	8.04	270359	432.807
19:44:11	175.48	4.96	4.94	4.7	8.04	260970	417.778
19:45:11	175.28	4.96	4.94	4.7	8.04	261171	418.099
19:46:11	175.08	4.96	4.94	4.7	8.04	260625	417.225
19:47:11	174.88	4.96	4.94	4.7	8.04	260088	416.364
温度：70℃ 压力：7Mpa							426.575
时间	泵位	入口压力/MPa	出口压力/MPa	回压/MPa	围压/MPa	电阻/Ω	电阻率/Ω·m
20:11:11	172.713	7.01	6.98	6.7	10.03	248843	398.364
20:12:11	172.513	7.01	6.98	6.7	10.03	248519	397.845
20:13:11	172.313	7.01	6.98	6.7	10.03	249722	399.77
20:14:11	172.113	7.01	6.98	6.7	10.03	249743	399.805
20:15:11	171.913	7.01	6.98	6.7	10.03	249197	398.93
20:16:11	171.713	7.01	6.98	6.7	10.03	248813	398.315
20:17:11	171.513	7.01	6.98	6.7	10.03	248260	397.431
20:18:11	171.313	7.01	6.98	6.7	10.03	248353	397.579
20:19:11	171.113	7.01	6.98	6.7	10.03	248321	397.527
20:20:11	170.913	7.01	6.98	6.7	10.03	248239	397.396
温度：70℃ 压力：7.5Mpa							398.296
时间	泵位	入口压力/MPa	出口压力/MPa	回压/MPa	围压/MPa	电阻/Ω	电阻率/Ω·m
20:37:11	167.736	7.51	7.5	7.2	10.49	243803	390.294
20:38:11	167.536	7.51	7.5	7.2	10.49	243546	389.883
20:39:11	167.336	7.51	7.5	7.2	10.49	243373	389.607
20:40:11	167.136	7.51	7.5	7.2	10.49	243131	389.22
20:41:11	166.936	7.51	7.5	7.2	10.49	243021	389.043
20:42:11	166.736	7.51	7.5	7.2	10.49	242775	388.65
20:43:11	166.536	7.51	7.5	7.2	10.49	242594	388.359
20:44:11	166.336	7.51	7.5	7.2	10.49	242255	387.817
20:45:11	166.136	7.51	7.5	7.2	10.49	242020	387.44
20:46:11	165.936	7.51	7.5	7.2	10.49	241802	387.091
温度：70℃ 压力：12Mpa							388.74
时间	泵位	入口压力/MPa	出口压力/MPa	回压/MPa	围压/MPa	电阻/Ω	电阻率/Ω·m
21:08:11	160.427	12.05	12.06	11.7	15.05	234220	374.954
21:09:11	160.227	12.05	12.06	11.7	15.05	234613	375.583
21:10:11	160.027	12.05	12.06	11.7	15.05	235062	376.302
21:11:11	159.827	12.05	12.06	11.7	15.05	235190	376.506
21:12:11	159.627	12.05	12.06	11.7	15.05	235701	377.325
21:13:11	159.427	12.05	12.06	11.7	15.05	235908	377.657
21:14:11	159.227	12.05	12.06	11.7	15.05	235902	377.646
21:15:11	159.027	12.05	12.06	11.7	15.05	235924	377.681
21:16:11	158.827	12.05	12.06	11.7	15.05	235992	377.791
21:17:11	158.627	12.05	12.06	11.7	15.05	235790	377.467
温度：70℃ 压力：20Mpa							376.891
时间	泵位	入口压力/MPa	出口压力/MPa	回压/MPa	围压/MPa	电阻/Ω	电阻率/Ω·m
21:49:11	148.881	20.02	20.09	19.6	23.1	234322	375.118
21:50:11	148.681	20.02	20.09	19.6	23.1	234135	374.818
21:51:11	148.481	20.02	20.09	19.6	23.1	235892	377.631
21:52:11	148.281	20.02	20.09	19.6	23.1	234391	375.228
21:53:11	148.081	20.02	20.09	19.6	23.1	235395	376.835
21:54:11	147.881	20.02	20.09	19.6	23.1	234345	375.154
21:55:11	147.681	20.02	20.09	19.6	23.1	234945	376.115
21:56:11	147.481	20.02	20.09	19.6	23.1	234810	375.898
21:57:11	147.281	20.02	20.09	19.6	23.1	234196	374.915
21:58:11	147.081	20.02	20.09	19.6	23.1	234832	375.934
							375.765

## Sheet: 地层水
测量地层水饱和非导体管稳定时在不同温度压力下的电阻				假岩心	外径/cm	2.494
					内径/cm	1.012
					长度/cm	5.022
温度：26℃ 压力：5Mpa
时间	泵位	入口压力/MPa	出口压力/MPa	回压/MPa	围压/MPa	电阻/Ω	电阻率/Ω·m
06:25:59	341.296	4.98	4.97	4.7	7.98	6891.1	11.0317
06:26:59	341.096	4.98	4.97	4.7	7.98	6924.1	11.0845
06:27:59	340.896	4.98	4.97	4.7	7.98	6907.1	11.0573
06:28:59	340.696	4.98	4.97	4.7	7.98	6907.4	11.0578
06:29:59	340.496	4.98	4.97	4.7	7.98	6906.9	11.057
06:30:59	340.296	4.98	4.97	4.7	7.98	6899.1	11.0445
06:31:59	340.096	4.98	4.97	4.7	7.98	6901.5	11.0484
06:32:59	339.896	4.98	4.97	4.7	7.98	6911.3	11.064
06:33:59	339.696	4.98	4.97	4.7	7.98	6884.8	11.0216
06:34:59	339.496	4.98	4.97	4.7	7.98	6893.2	11.0351
温度：26℃ 压力：7Mpa							11.0502
时间	泵位	入口压力/MPa	出口压力/MPa	回压/MPa	围压/MPa	电阻/Ω	电阻率/Ω·m
06:51:59	336.19	7.05	7.04	6.75	10.04	6824.8	10.9256
06:52:59	335.99	7.05	7.04	6.75	10.04	6849.6	10.9653
06:53:59	335.79	7.05	7.04	6.75	10.04	6854.3	10.9728
06:54:59	335.59	7.05	7.04	6.75	10.04	6854.8	10.9736
06:55:59	335.39	7.05	7.04	6.75	10.04	6850.9	10.9673
06:56:59	335.19	7.05	7.04	6.75	10.04	6822.1	10.9212
06:57:59	334.99	7.05	7.04	6.75	10.04	6846.6	10.9605
06:58:59	334.79	7.05	7.04	6.75	10.04	6832.1	10.9373
06:59:59	334.59	7.05	7.04	6.75	10.04	6846.4	10.9601
07:00:59	334.39	7.05	7.04	6.75	10.04	6853.4	10.9713
温度：26℃ 压力：7.5Mpa							0
							10.9555
时间	泵位	入口压力/MPa	出口压力/MPa	回压/MPa	围压/MPa	电阻/Ω	电阻率/Ω·m
07:22:59	329.757	7.51	7.49	7.2	10.43	6843.2	10.955
07:23:59	329.557	7.51	7.49	7.2	10.43	6843.2	10.955
07:24:59	329.357	7.51	7.49	7.2	10.43	6842.9	10.9545
07:25:59	329.157	7.51	7.49	7.2	10.43	6849.1	10.9645
07:26:59	328.957	7.51	7.49	7.2	10.43	6832.9	10.9385
07:27:59	328.757	7.51	7.49	7.2	10.43	6820.4	10.9185
07:28:59	328.557	7.51	7.49	7.2	10.43	6823.4	10.9233
07:29:59	328.357	7.51	7.49	7.2	10.43	6820.9	10.9193
07:30:59	328.157	7.51	7.49	7.2	10.43	6822	10.9211
07:31:59	327.957	7.51	7.49	7.2	10.43	6800.5	10.8867
温度：26℃ 压力：12Mpa							10.9336
时间	泵位	入口压力/MPa	出口压力/MPa	回压/MPa	围压/MPa	电阻/Ω	电阻率/Ω·m
07:59:59	321.925	12.08	12.09	11.7	15.03	6814.6	10.9092
08:00:59	321.725	12.08	12.09	11.7	15.03	6790.8	10.8711
08:01:59	321.525	12.08	12.09	11.7	15.03	6799.3	10.8847
08:02:59	321.325	12.08	12.09	11.7	15.03	6803.6	10.8916
08:03:59	321.125	12.08	12.09	11.7	15.03	6792.4	10.8737
08:04:59	320.925	12.08	12.09	11.7	15.03	6787.4	10.8657
08:05:59	320.725	12.08	12.09	11.7	15.03	6792.2	10.8734
08:06:59	320.525	12.08	12.09	11.7	15.03	6784.7	10.8614
08:07:59	320.325	12.08	12.09	11.7	15.03	6782	10.857
08:08:59	320.125	12.08	12.09	11.7	15.03	6783.5	10.8594
温度：26℃ 压力：20Mpa							10.8747
时间	泵位	入口压力/MPa	出口压力/MPa	回压/MPa	围压/MPa	电阻/Ω	电阻率/Ω·m
08:41:59	311.174	20.02	20.09	19.7	22.99	6642.7	10.634
08:42:59	310.974	20.02	20.09	19.7	22.99	6643.9	10.636
08:43:59	310.774	20.02	20.09	19.7	22.99	6647	10.6409
08:44:59	310.574	20.02	20.09	19.7	22.99	6609.9	10.5815
08:45:59	310.374	20.02	20.09	19.7	22.99	6615.4	10.5903
08:46:59	310.174	20.02	20.09	19.7	22.99	6626.6	10.6083
08:47:59	309.974	20.02	20.09	19.7	22.99	6658.2	10.6589
08:48:59	309.774	20.02	20.09	19.7	22.99	6656	10.6553
08:49:59	309.574	20.02	20.09	19.7	22.99	6662.2	10.6653
08:50:59	309.374	20.02	20.09	19.7	22.99	6640.7	10.6308
							10.6301
温度：31℃ 压力：5Mpa
时间	泵位	入口压力/MPa	出口压力/MPa	回压/MPa	围压/MPa	电阻/Ω	电阻率/Ω·m
10:31:59	282.274	5	4.96	4.7	7.96	6306.9	10.0965
10:32:59	282.074	5	4.96	4.7	7.96	6286.3	10.0635
10:33:59	281.874	5	4.96	4.7	7.96	6276.9	10.0485
10:34:59	281.674	5	4.96	4.7	7.96	6253.3	10.0107
10:35:59	281.474	5	4.96	4.7	7.96	6206.9	9.93639
10:36:59	281.274	5	4.96	4.7	7.96	6194.4	9.91638
10:37:59	281.074	5	4.96	4.7	7.96	6180.9	9.89477
10:38:59	280.874	5	4.96	4.7	7.96	6169.7	9.87684
10:39:59	280.674	5	4.96	4.7	7.96	6156.5	9.85571
10:40:59	280.474	5	4.96	4.7	7.96	6179.2	9.89205
温度：31℃ 压力：7Mpa							9.95912
时间	泵位	入口压力/MPa	出口压力/MPa	回压/MPa	围压/MPa	电阻/Ω	电阻率/Ω·m
11:01:59	276.862	7.01	6.98	6.7	10.09	6137.8	9.82577
11:02:59	276.662	7.01	6.98	6.7	10.09	6140.2	9.82961
11:03:59	276.462	7.01	6.98	6.7	10.09	6140.9	9.83074
11:04:59	276.262	7.01	6.98	6.7	10.09	6139.5	9.82849
11:05:59	276.062	7.01	6.98	6.7	10.09	6166.5	9.87172
11:06:59	275.862	7.01	6.98	6.7	10.09	6175.4	9.88596
11:07:59	275.662	7.01	6.98	6.7	10.09	6148.5	9.8429
11:08:59	275.462	7.01	6.98	6.7	10.09	6144.8	9.83698
11:09:59	275.262	7.01	6.98	6.7	10.09	6175	9.88532
11:10:59	275.062	7.01	6.98	6.7	10.09	6150.9	9.84674
温度：31℃ 压力：7.5Mpa							9.84842
时间	泵位	入口压力/MPa	出口压力/MPa	回压/MPa	围压/MPa	电阻/Ω	电阻率/Ω·m
11:40:59	269.022	7.51	7.49	7.2	10.43	6137.8	9.82577
11:41:59	268.822	7.51	7.49	7.2	10.43	6140.2	9.82961
11:42:59	268.622	7.51	7.49	7.2	10.43	6140.9	9.83074
11:43:59	268.422	7.51	7.49	7.2	10.43	6139.5	9.82849
11:44:59	268.222	7.51	7.49	7.2	10.43	6166.5	9.87172
11:45:59	268.022	7.51	7.49	7.2	10.43	6175.4	9.88596
11:46:59	267.822	7.51	7.49	7.2	10.43	6148.5	9.8429
11:47:59	267.622	7.51	7.49	7.2	10.43	6144.8	9.83698
11:48:59	267.422	7.51	7.49	7.2	10.43	6175	9.88532
11:49:59	267.222	7.51	7.49	7.2	10.43	6150.9	9.84674
温度：31℃ 压力：12Mpa							9.84842
时间	泵位	入口压力/MPa	出口压力/MPa	回压/MPa	围压/MPa	电阻/Ω	电阻率/Ω·m
12:17:59	261.41	12.08	12.09	11.7	15.02	6000.1	9.60533
12:18:59	261.21	12.08	12.09	11.7	15.02	6016.3	9.63127
12:19:59	261.01	12.08	12.09	11.7	15.02	5999.3	9.60405
12:20:59	260.81	12.08	12.09	11.7	15.02	6045.6	9.67817
12:21:59	260.61	12.08	12.09	11.7	15.02	6030.1	9.65336
12:22:59	260.41	12.08	12.09	11.7	15.02	6039.7	9.66873
12:23:59	260.21	12.08	12.09	11.7	15.02	6053.5	9.69082
12:24:59	260.01	12.08	12.09	11.7	15.02	6095.3	9.75774
12:25:59	259.81	12.08	12.09	11.7	15.02	6086.7	9.74397
12:26:59	259.61	12.08	12.09	11.7	15.02	6115.8	9.79055
温度：31℃ 压力：20Mpa							9.6824
时间	泵位	入口压力/MPa	出口压力/MPa	回压/MPa	围压/MPa	电阻/Ω	电阻率/Ω·m
13:01:59	250.48	20.09	20.13	19.65	23.01	6098.5	9.76286
13:02:59	250.28	20.09	20.13	19.65	23.01	6088.5	9.74685
13:03:59	250.08	20.09	20.13	19.65	23.01	6106.5	9.77567
13:04:59	249.88	20.09	20.13	19.65	23.01	6084.1	9.73981
13:05:59	249.68	20.09	20.13	19.65	23.01	6077.2	9.72876
13:06:59	249.48	20.09	20.13	19.65	23.01	6103.7	9.77118
13:07:59	249.28	20.09	20.13	19.65	23.01	6074	9.72364
13:08:59	249.08	20.09	20.13	19.65	23.01	6101.1	9.76702
13:09:59	248.88	20.09	20.13	19.65	23.01	6073.8	9.72332
13:10:59	248.68	20.09	20.13	19.65	23.01	6079.3	9.73212
							9.74712
温度：35℃ 压力：5Mpa
时间	泵位	入口压力/MPa	出口压力/MPa	回压/MPa	围压/MPa	电阻/Ω	电阻率/Ω·m
14:11:59	236.116	4.99	4.96	4.7	8.03	5817.1	9.31238
14:12:59	235.916	4.99	4.96	4.7	8.03	5810.9	9.30245
14:13:59	235.716	4.99	4.96	4.7	8.03	5813.3	9.30629
14:14:59	235.516	4.99	4.96	4.7	8.03	5805.4	9.29365
14:15:59	235.316	4.99	4.96	4.7	8.03	5834.6	9.34039
14:16:59	235.116	4.99	4.96	4.7	8.03	5835.3	9.34151
14:17:59	234.916	4.99	4.96	4.7	8.03	5836.4	9.34327
14:18:59	234.716	4.99	4.96	4.7	8.03	5809.5	9.30021
14:19:59	234.516	4.99	4.96	4.7	8.03	5844.6	9.3564
14:20:59	234.316	4.99	4.96	4.7	8.03	5840.5	9.34984
温度：35℃ 压力：7Mpa							9.32464
时间	泵位	入口压力/MPa	出口压力/MPa	回压/MPa	围压/MPa	电阻/Ω	电阻率/Ω·m
14:36:59	232.003	6.99	6.97	6.7	10.03	5832.1	9.33639
14:37:59	231.803	6.99	6.97	6.7	10.03	5844.4	9.35608
14:38:59	231.603	6.99	6.97	6.7	10.03	5820.7	9.31814
14:39:59	231.403	6.99	6.97	6.7	10.03	5855.5	9.37385
14:40:59	231.203	6.99	6.97	6.7	10.03	5870.5	9.39786
14:41:59	231.003	6.99	6.97	6.7	10.03	5882	9.41627
14:42:59	230.803	6.99	6.97	6.7	10.03	5853.4	9.37049
14:43:59	230.603	6.99	6.97	6.7	10.03	5873.7	9.40298
14:44:59	230.403	6.99	6.97	6.7	10.03	5835.6	9.34199
14:45:59	230.203	6.99	6.97	6.7	10.03	5857.8	9.37753
温度：35℃ 压力：7.5Mpa							9.36916
时间	泵位	入口压力/MPa	出口压力/MPa	回压/MPa	围压/MPa	电阻/Ω	电阻率/Ω·m
14:51:59	229.175	7.5	7.48	7.2	10.47	5818.4	9.31446
14:52:59	228.975	7.5	7.48	7.2	10.47	5813.6	9.30677
14:53:59	228.775	7.5	7.48	7.2	10.47	5814.8	9.30869
14:54:59	228.575	7.5	7.48	7.2	10.47	5823.8	9.3231
14:55:59	228.375	7.5	7.48	7.2	10.47	5819.5	9.31622
14:56:59	228.175	7.5	7.48	7.2	10.47	5820.8	9.3183
14:57:59	227.975	7.5	7.48	7.2	10.47	5797.1	9.28036
14:58:59	227.775	7.5	7.48	7.2	10.47	5831	9.33463
14:59:59	227.575	7.5	7.48	7.2	10.47	5838.2	9.34615
15:00:59	227.375	7.5	7.48	7.2	10.47	5848.3	9.36232
温度：35℃ 压力：12Mpa							9.3211
时间	泵位	入口压力/MPa	出口压力/MPa	回压/MPa	围压/MPa	电阻/Ω	电阻率/Ω·m
15:21:59	221.185	12.03	12.05	11.7	15.04	5862.1	9.38441
15:22:59	220.985	12.03	12.05	11.7	15.04	5853.9	9.37129
15:23:59	220.785	12.03	12.05	11.7	15.04	5813.8	9.30709
15:24:59	220.585	12.03	12.05	11.7	15.04	5799.5	9.2842
15:25:59	220.385	12.03	12.05	11.7	15.04	5791.1	9.27075
15:26:59	220.185	12.03	12.05	11.7	15.04	5803	9.2898
15:27:59	219.985	12.03	12.05	11.7	15.04	5764.4	9.22801
15:28:59	219.785	12.03	12.05	11.7	15.04	5795.3	9.27748
15:29:59	219.585	12.03	12.05	11.7	15.04	5780.1	9.25314
15:30:59	219.385	12.03	12.05	11.7	15.04	5769.7	9.2365
温度：35℃ 压力：20Mpa							9.29027
时间	泵位	入口压力/MPa	出口压力/MPa	回压/MPa	围压/MPa	电阻/Ω	电阻率/Ω·m
16:01:59		20.05	20.11	19.65	23.08	5595.5	8.95762
16:02:59		20.05	20.11	19.65	23.08	5571.7	8.91952
16:03:59		20.05	20.11	19.65	23.08	5602	8.96803
16:04:59		20.05	20.11	19.65	23.08	5586.2	8.94274
16:05:59		20.05	20.11	19.65	23.08	5620	8.99685
16:06:59		20.05	20.11	19.65	23.08	5601.2	8.96675
16:07:59		20.05	20.11	19.65	23.08	5625	9.00485
16:08:59		20.05	20.11	19.65	23.08	5619	8.99525
16:09:59		20.05	20.11	19.65	23.08	5605.9	8.97427
16:10:59		20.05	20.11	19.65	23.08	5620.8	8.99813
							8.9724
温度：50℃ 压力：5Mpa
时间	泵位	入口压力/MPa	出口压力/MPa	回压/MPa	围压/MPa	电阻/Ω	电阻率/Ω·m
18:33:59	194.184	5	4.96	4.75	8.03	3240.5	5.18759
18:34:59	193.984	5	4.96	4.75	8.03	3274.9	5.24266
18:35:59	193.784	5	4.96	4.75	8.03	3279.7	5.25035
18:36:59	193.584	5	4.96	4.75	8.03	3295.9	5.27628
18:37:59	193.384	5	4.96	4.75	8.03	3305.7	5.29197
18:38:59	193.184	5	4.96	4.75	8.03	3271.2	5.23674
18:39:59	192.984	5	4.96	4.75	8.03	3284.2	5.25755
18:40:59	192.784	5	4.96	4.75	8.03	3232.9	5.17543
18:41:59	192.584	5	4.96	4.75	8.03	3186.1	5.10051
18:42:59	192.384	5	4.96	4.75	8.03	3176.5	5.08514
温度：50℃ 压力：7Mpa							5.21042
时间	泵位	入口压力/MPa	出口压力/MPa	回压/MPa	围压/MPa	电阻/Ω	电阻率/Ω·m
20:51:59	152.473	7.02	7.01	6.7	10.02	2050.7	3.28289
20:52:59	152.273	7.02	7.01	6.7	10.02	2035.4	3.2584
20:53:59	152.073	7.02	7.01	6.7	10.02	2059.9	3.29762
20:54:59	151.873	7.02	7.01	6.7	10.02	2058.8	3.29586
20:55:59	151.673	7.02	7.01	6.7	10.02	2033.9	3.25599
20:56:59	151.473	7.02	7.01	6.7	10.02	2065.1	3.30594
20:57:59	151.273	7.02	7.01	6.7	10.02	2065.4	3.30642
20:58:59	151.073	7.02	7.01	6.7	10.02	2064	3.30418
20:59:59	150.873	7.02	7.01	6.7	10.02	2058.3	3.29505					温度	压力	电阻率			温度	压力	电阻率
21:00:59	150.673	7.02	7.01	6.7	10.02	2052.9	3.28641					26	5	11.0502			26	5	11.0502
温度：50℃ 压力：7.5Mpa							3.5558						7	10.9713				7	10.9713
													7.5	10.9336				7.5	10.9336
时间	泵位	入口压力/MPa	出口压力/MPa	回压/MPa	围压/MPa	电阻/Ω	电阻率/Ω·m						12	10.8747				12	10.8747
21:11:59	152.767	7.52	7.49	7.2	10.43	2098.5	3.35941						20	10.6301				20	10.6301
21:12:59	152.567	7.52	7.49	7.2	10.43	2074.2	3.32051					31	5	9.95912			31	5	9.95912
21:13:59	152.367	7.52	7.49	7.2	10.43	2097	3.35701						7	9.84842				7	9.84842
21:14:59	152.167	7.52	7.49	7.2	10.43	2076.6	3.32435						7.5	9.72	9.85			7.5	9.85
21:15:59	151.967	7.52	7.49	7.2	10.43	2167.5	3.46987						12	9.6824				12	9.6824
21:16:59	151.767	7.52	7.49	7.2	10.43	2191.2	3.50781						20	9.62	9.75			20	9.75
21:17:59	151.567	7.52	7.49	7.2	10.43	2183.5	3.49548					35	5	9.4	9.32		35	5	9.32
21:18:59	151.367	7.52	7.49	7.2	10.43	2179.9	3.48972						7	9.36916				7	9.36916
21:19:59	151.167	7.52	7.49	7.2	10.43	2183.1	3.49484						7.5	9.29027				7.5	9.29027
21:20:59	150.967	7.52	7.49	7.2	10.43	2173.8	3.47995						12	9.29027	9.29			12	9.29
温度：50℃ 压力：12Mpa							3.4299						20	8.9724				20	8.9724
												50	5	4.77753			50	5	4.77753
时间	泵位	入口压力/MPa	出口压力/MPa	回压/MPa	围压/MPa	电阻/Ω	电阻率/Ω·m						7	4.72213				7	4.72213
21:50:59	137.801	12.06	12.09	11.7	15.04	2116.7	3.38855						7.5	4.56566				7.5	4.56566
21:51:59	137.601	12.06	12.09	11.7	15.04	2108.5	3.37542						12	4.50299				12	4.50299
21:52:59	137.401	12.06	12.09	11.7	15.04	2127.2	3.40535						20	4.46365				20	4.46365
21:53:59	137.201	12.06	12.09	11.7	15.04	2112.6	3.38198				50和70摄氏度调换位置	70	5	4.1			70	5	4.1
21:54:59	137.001	12.06	12.09	11.7	15.04	2119.6	3.39319				3.56改过		7	3.5558				7	3.5558
21:55:59	136.801	12.06	12.09	11.7	15.04	2115.2	3.38614						7.5	3.4299				7.5	3.4299
21:56:59	136.601	12.06	12.09	11.7	15.04	2111.2	3.37974						12	3.39948				12	3.39948
21:57:59	136.401	12.06	12.09	11.7	15.04	2176.5	3.48428						20	3.334	3.67			20	3.67
21:58:59	136.201	12.06	12.09	11.7	15.04	2127.9	3.40647
21:59:59	136.001	12.06	12.09	11.7	15.04	2119.9	3.39367							压力	26℃	31℃	35℃	50℃	70℃
温度：50℃ 压力：20Mpa							3.39948							5MPa	11.0502	9.95912	9.32	4.77753	4.1
														7	10.9713	9.84842	9.36916	4.72213	3.5558
时间	泵位	入口压力/MPa	出口压力/MPa	回压/MPa	围压/MPa	电阻/Ω	电阻率/Ω·m							7.5	10.9336	9.85	9.29027	4.56566	3.4299
22:34:59	368.113	20.07	20.13	19.6	23.11	2380.3	3.81053							12	10.8747	9.6824	9.29	4.50299	3.39948
22:35:59	367.913	20.07	20.13	19.6	23.11	2354.7	3.76955							20	10.6301	9.75	8.9724	4.46365	3.67	3.67
22:36:59	367.713	20.07	20.13	19.6	23.11	2521.1	4.03593
22:37:59	367.513	20.07	20.13	19.6	23.11	2305.6	3.69095							改过的画图
22:38:59	367.313	20.07	20.13	19.6	23.11	2290.9	3.66742							5	11.0502	9.95912	9.43	4.77753	4.1
22:39:59	367.113	20.07	20.13	19.6	23.11	2294.2	3.6727							7	10.9713	9.84842	9.33916	4.72213	3.9558
22:40:59	366.913	20.07	20.13	19.6	23.11	2224.7	3.56144							7.5	10.9337	9.795	9.29027	4.56566	3.8299
22:41:59	366.713	20.07	20.13	19.6	23.11	2223.9	3.56016							12	10.8747	9.6824	9.19	4.50299	3.79479
22:42:59	366.513	20.07	20.13	19.6	23.11	2180.3	3.49036							20	10.6301	9.35	8.9724	4.39365	3.67
22:43:59	366.313	20.07	20.13	19.6	23.11	2124.8	3.40151
温度：70℃ 压力：5Mpa							3.66605
时间	泵位	入口压力/MPa	出口压力/MPa	回压/MPa	围压/MPa	电阻/Ω	电阻率/Ω·m
08:07:59	329.427	4.99	4.96	4.7	8.05	2994.5	4.79378
08:08:59	329.227	4.99	4.96	4.7	8.05	2967.4	4.7504
08:09:59	329.027	4.99	4.96	4.7	8.05	2984.7	4.77809
08:10:59	328.827	4.99	4.96	4.7	8.05	2975.4	4.76321
08:11:59	328.627	4.99	4.96	4.7	8.05	2983.4	4.77601
08:12:59	328.427	4.99	4.96	4.7	8.05	3016	4.8282
08:13:59	328.227	4.99	4.96	4.7	8.05	2997.1	4.79794
08:14:59	328.027	4.99	4.96	4.7	8.05	2989.1	4.78514
08:15:59	327.827	4.99	4.96	4.7	8.05	2969.1	4.75312
08:16:59	327.627	4.99	4.96	4.7	8.05	2966.8	4.74944
温度：70℃ 压力：7Mpa							4.77753
时间	泵位	入口压力/MPa	出口压力/MPa	回压/MPa	围压/MPa	电阻/Ω	电阻率/Ω·m
08:31:59	325.309	7.05	7.02	6.7	10.04	2986.4	4.78082
08:32:59	325.109	7.05	7.02	6.7	10.04	2965.7	4.74768
08:33:59	324.909	7.05	7.02	6.7	10.04	2976.5	4.76497
08:34:59	324.709	7.05	7.02	6.7	10.04	2946.8	4.71742
08:35:59	324.509	7.05	7.02	6.7	10.04	2962.1	4.74191
08:36:59	324.309	7.05	7.02	6.7	10.04	2936.5	4.70093
08:37:59	324.109	7.05	7.02	6.7	10.04	2941.9	4.70958
08:38:59	323.909	7.05	7.02	6.7	10.04	2935.8	4.69981
08:39:59	323.709	7.05	7.02	6.7	10.04	2926.2	4.68444
08:40:59	323.509	7.05	7.02	6.7	10.04	2919.5	4.67372
温度：70℃ 压力：7.5Mpa							4.72213
时间	泵位	入口压力/MPa	出口压力/MPa	回压/MPa	围压/MPa	电阻/Ω	电阻率/Ω·m
09:13:59	317.117	7.55	7.54	7.2	10.44	2850.1	4.56262
09:14:59	316.917	7.55	7.54	7.2	10.44	2864.8	4.58615
09:15:59	316.717	7.55	7.54	7.2	10.44	2862.9	4.58311
09:16:59	316.517	7.55	7.54	7.2	10.44	2860.7	4.57959
09:17:59	316.317	7.55	7.54	7.2	10.44	2840.6	4.54741
09:18:59	316.117	7.55	7.54	7.2	10.44	2838.6	4.54421
09:19:59	315.917	7.55	7.54	7.2	10.44	2838.7	4.54437
09:20:59	315.717	7.55	7.54	7.2	10.44	2847.8	4.55894
09:21:59	315.517	7.55	7.54	7.2	10.44	2850.2	4.56278
09:22:59	315.317	7.55	7.54	7.2	10.44	2865.6	4.58743
温度：70℃ 压力：12Mpa							4.56566
时间	泵位	入口压力/MPa	出口压力/MPa	回压/MPa	围压/MPa	电阻/Ω	电阻率/Ω·m
09:51:59	306.764	12.03	12.02	11.65	15.04	2824.1	4.521
09:52:59	306.564	12.03	12.02	11.65	15.04	2815.6	4.50739
09:53:59	306.364	12.03	12.02	11.65	15.04	2834.4	4.53748
09:54:59	306.164	12.03	12.02	11.65	15.04	2824.4	4.52148
09:55:59	305.964	12.03	12.02	11.65	15.04	2822.1	4.51779
09:56:59	305.764	12.03	12.02	11.65	15.04	2806.8	4.4933
09:57:59	305.564	12.03	12.02	11.65	15.04	2800.5	4.48321
09:58:59	305.364	12.03	12.02	11.65	15.04	2792.8	4.47089
09:59:59	305.164	12.03	12.02	11.65	15.04	2804.3	4.4893
10:00:59	304.964	12.03	12.02	11.65	15.04	2803.5	4.48802
温度：70℃ 压力：20Mpa							4.50299
时间	泵位	入口压力/MPa	出口压力/MPa	回压/MPa	围压/MPa	电阻/Ω	电阻率/Ω·m
10:44:59	290.493	20.03	20.09	19.6	23.11	2770.8	4.43567
10:45:59	290.293	20.03	20.09	19.6	23.11	2767.4	4.43023
10:46:59	290.093	20.03	20.09	19.6	23.11	2791.7	4.46913
10:47:59	289.893	20.03	20.09	19.6	23.11	2786.2	4.46032
10:48:59	289.693	20.03	20.09	19.6	23.11	2798.5	4.48001
10:49:59	289.493	20.03	20.09	19.6	23.11	2792.5	4.47041
10:50:59	289.293	20.03	20.09	19.6	23.11	2781.9	4.45344
10:51:59	289.093	20.03	20.09	19.6	23.11	2791.5	4.46881
10:52:59	288.893	20.03	20.09	19.6	23.11	2812	4.50162
10:53:59	288.693	20.03	20.09	19.6	23.11	2790.3	4.46689
							4.46365

## Sheet: 11.5过饱和二氧化碳
测量地层水饱和非导体管稳定时在不同温度压力下的电阻				假岩心	外径/cm	2.494
					内径/cm	1.012
					长度/cm	5.022
温度：26℃ 压力：5Mpa
时间	泵位	入口压力/MPa	出口压力/MPa	回压/MPa	围压/MPa	电阻/Ω	电阻率/Ω·m			m1	m2	Vg	气液比
10:44:49	484.592	5.13	5.11	4.7	8.07	60630.2	97.0606			17.697	20.257	86	33.5938
10:45:49	484.392	5.13	5.11	4.7	8.07	61002.8	97.6571			18.042	20.811	90	32.5027
10:46:49	484.192	5.13	5.11	4.7	8.07	61021	97.6862			17.697	20.393	90	33.3828
10:47:49	483.992	5.13	5.11	4.7	8.07	61126.6	97.8553						33.1597
10:48:49	483.792	5.13	5.11	4.7	8.07	61196.9	97.9678
10:49:49	483.592	5.13	5.11	4.7	8.07	61319.7	98.1644
10:50:49	483.392	5.13	5.11	4.7	8.07	61469	98.4034
10:51:49	483.192	5.13	5.11	4.7	8.07	61486.2	98.4309
10:52:49	482.992	5.13	5.11	4.7	8.07	61441.8	98.3599
10:53:49	482.792	5.13	5.11	4.7	8.07	61370.7	98.246
温度：26℃ 压力：7Mpa							97.9832
时间	泵位	入口压力/MPa	出口压力/MPa	回压/MPa	围压/MPa	电阻/Ω	电阻率/Ω·m			m1	m2	Vg	气液比
14:09:49	305.743	7.1	7.09	6.6	10.06	42659.3	68.2917			18.042	20.238	86	39.1621
14:10:49	305.543	7.1	7.09	6.6	10.06	42632.8	68.2492			18.042	20.527	96	38.6318
14:11:49	305.343	7.1	7.09	6.6	10.06	42926.1	68.7188			17.697	19.781	82	39.3474
14:12:49	305.143	7.1	7.09	6.6	10.06	42906.5	68.6874						39.0471
14:13:49	304.943	7.1	7.09	6.6	10.06	42932.2	68.7285
14:14:49	304.743	7.1	7.09	6.6	10.06	42892	68.6642
14:15:49	304.543	7.1	7.09	6.6	10.06	42946.7	68.7518
14:16:49	304.343	7.1	7.09	6.6	10.06	42981.6	68.8076
14:17:49	304.143	7.1	7.09	6.6	10.06	42955.2	68.7654
14:18:49	303.943	7.1	7.09	6.6	10.06	43006.1	68.8468
温度：26℃ 压力：7.5Mpa							68.6511
时间	泵位	入口压力/MPa	出口压力/MPa	回压/MPa	围压/MPa	电阻/Ω	电阻率/Ω·m			m1	m2	Vg	气液比
19:56:49	259.981	7.74	7.75	7.2	10.61	41641.7	66.6626			18.042	20.33	90	39.3357
19:57:49	259.781	7.74	7.75	7.2	10.61	41868.6	67.0259			17.697	19.999	91	39.5308
19:58:49	259.581	7.74	7.75	7.2	10.61	41936.7	67.1349			17.697	19.906	86	38.9316
19:59:49	259.381	7.74	7.75	7.2	10.61	41979.9	67.204						39.2661
20:00:49	259.181	7.74	7.75	7.2	10.61	42008.8	67.2503
20:01:49	258.981	7.74	7.75	7.2	10.61	41974.5	67.1954
20:02:49	258.781	7.74	7.75	7.2	10.61	42007.1	67.2476
20:03:49	258.581	7.74	7.75	7.2	10.61	41961.9	67.1752
20:04:49	258.381	7.74	7.75	7.2	10.61	41899.6	67.0755
20:05:49	258.181	7.74	7.75	7.2	10.61	41867.8	67.0246
温度：26℃ 压力：12Mpa							67.0996
时间	泵位	入口压力/MPa	出口压力/MPa	回压/MPa	围压/MPa	电阻/Ω	电阻率/Ω·m			m1	m2	Vg	气液比
14:34:02	333.851	12.04	12.05	11.7	15.13	41668.8	66.706			18.042	20.223	86	39.4315
14:35:02	333.651	12.04	12.05	11.7	15.13	41598.6	66.5936			17.697	19.857	88	40.7407
14:36:02	333.451	12.04	12.05	11.7	15.13	41756	66.8456			17.697	19.798	86	40.9329
14:37:02	333.251	12.04	12.05	11.7	15.13	42054	67.3227						40.3684
14:38:02	333.051	12.04	12.05	11.7	15.13	41887	67.0553
14:39:02	332.851	12.04	12.05	11.7	15.13	41408.5	66.2893
14:40:02	332.651	12.04	12.05	11.7	15.13	41164.9	65.8993
14:41:02	332.451	12.04	12.05	11.7	15.13	41257	66.0468
14:42:02	332.251	12.04	12.05	11.7	15.13	41318.7	66.1455
14:43:02	332.051	12.04	12.05	11.7	15.13	41349	66.1941
温度：26℃ 压力：20Mpa							66.5098
时间	泵位	入口压力/MPa	出口压力/MPa	回压/MPa	围压/MPa	电阻/Ω	电阻率/Ω·m			m1	m2	Vg	气液比
22:32:49	308.093	20.28	20.31	19.5	23.26	36491.3	58.4175			18.042	20.114	86	41.5058
22:33:49	307.893	20.28	20.31	19.5	23.26	36414.7	58.2949			17.697	19.772	88	42.4096
22:34:49	307.693	20.28	20.31	19.5	23.26	36301.3	58.1134			18.042	20.177	89	41.6862
22:35:49	307.493	20.28	20.31	19.5	23.26	36173.5	57.9088
22:36:49	307.293	20.28	20.31	19.5	23.26	36114.9	57.815
22:37:49	307.093	20.28	20.31	19.5	23.26	35988.7	57.613						41.8672
22:38:49	306.893	20.28	20.31	19.5	23.26	35904.1	57.4775
22:39:49	306.693	20.28	20.31	19.5	23.26	35778.4	57.2763
22:40:49	306.493	20.28	20.31	19.5	23.26	35667.3	57.0984
22:41:49	306.293	20.28	20.31	19.5	23.26	35557.8	56.9231
							57.6938
温度：31℃ 压力：5Mpa
时间	泵位	入口压力/MPa	出口压力/MPa	回压/MPa	围压/MPa	电阻/Ω	电阻率/Ω·m			m1	m2	Vg	气液比
09:32:59	328.563	5	4.97	4.7	8.04	38293.9	61.3033			18.042	20.894	86	30.1543
09:33:59	328.363	5	4.97	4.7	8.04	38293.7	61.3029			18.042	20.864	84	29.7661
09:34:59	328.163	5	4.97	4.7	8.04	38329.3	61.3599			18.042	20.929	84	29.0959
09:35:59	327.963	5	4.97	4.7	8.04	38333.7	61.367
09:36:59	327.763	5	4.97	4.7	8.04	38341.2	61.379
09:37:59	327.563	5	4.97	4.7	8.04	38304.4	61.3201						29.6721
09:38:59	327.363	5	4.97	4.7	8.04	38297.7	61.3093
09:39:59	327.163	5	4.97	4.7	8.04	38316.5	61.3394
09:40:59	326.963	5	4.97	4.7	8.04	38312.8	61.3335
09:41:59	326.763	5	4.97	4.7	8.04	38291.4	61.2993
温度：31℃ 压力：7Mpa							61.3314
时间	泵位	入口压力/MPa	出口压力/MPa	回压/MPa	围压/MPa	电阻/Ω	电阻率/Ω·m			m1	m2	Vg	气液比
10:30:59	303.48	7.09	7.1	6.6	10.9	35856.4	57.4012			18.042	20.498	90	36.645
10:31:59	303.28	7.09	7.1	6.6	10.9	35836.7	57.3696			17.697	19.961	82	36.2191
10:32:59	303.08	7.09	7.1	6.6	10.9	35819.4	57.3419			17.697	19.996	85	36.9726
10:33:59	302.88	7.09	7.1	6.6	10.9	35811.7	57.3296						36.6122
10:34:59	302.68	7.09	7.1	6.6	10.9	35768.3	57.2601
10:35:59	302.48	7.09	7.1	6.6	10.9	35706.9	57.1618
10:36:59	302.28	7.09	7.1	6.6	10.9	35779.7	57.2784
10:37:59	302.08	7.09	7.1	6.6	10.9	35817.5	57.3389
10:38:59	301.88	7.09	7.1	6.6	10.9	35792.5	57.2989
10:39:59	301.68	7.09	7.1	6.6	10.9	35794	57.3013
温度：31℃ 压力：7.5Mpa							57.3082
时间	泵位	入口压力/MPa	出口压力/MPa	回压/MPa	围压/MPa	电阻/Ω	电阻率/Ω·m			m1	m2	Vg	气液比
11:17:59	269.373	7.54	7.53	7.1	10.57	35414.6	56.6939			18.042	20.376	85	36.4182
11:18:59	269.173	7.54	7.53	7.1	10.57	35409.1	56.6851			17.697	20.021	86	37.0052
11:19:59	268.973	7.54	7.53	7.1	10.57	35401.5	56.6729			18.042	20.505	90	36.5408
11:20:59	268.773	7.54	7.53	7.1	10.57	35395.6	56.6635
11:21:59	268.573	7.54	7.53	7.1	10.57	35383.5	56.6441						36.6547
11:22:59	268.373	7.54	7.53	7.1	10.57	35331.9	56.5615
11:23:59	268.173	7.54	7.53	7.1	10.57	35346.6	56.585
11:24:59	267.973	7.54	7.53	7.1	10.57	35332.9	56.5631
11:25:59	267.773	7.54	7.53	7.1	10.57	35307.4	56.5223
11:26:59	267.573	7.54	7.53	7.1	10.57	35290.6	56.4954
温度：31℃ 压力：12Mpa							56.6087
时间	泵位	入口压力/MPa	出口压力/MPa	回压/MPa	围压/MPa	电阻/Ω	电阻率/Ω·m			m1	m2	Vg	气液比
12:44:59	244.716	12.11	12.1	11.5	15.16	33055.6	52.9175
12:45:59	244.516	12.11	12.1	11.5	15.16	33025.3	52.869			17.697	20.037	88	37.6068
12:46:59	244.316	12.11	12.1	11.5	15.16	33010.8	52.8457			18.042	20.465	92	37.9695
12:47:59	244.116	12.11	12.1	11.5	15.16	32965.5	52.7732			17.697	19.982	85	37.1991
12:48:59	243.916	12.11	12.1	11.5	15.16	32976.7	52.7912
12:49:59	243.716	12.11	12.1	11.5	15.16	32952.6	52.7526						37.5918
12:50:59	243.516	12.11	12.1	11.5	15.16	32941.2	52.7343
12:51:59	243.316	12.11	12.1	11.5	15.16	32903	52.6732
12:52:59	243.116	12.11	12.1	11.5	15.16	32902.7	52.6727
12:53:59	242.916	12.11	12.1	11.5	15.16	32942.2	52.7359									温度	压力/MPa	电阻率	气液比
温度：31℃ 压力：20Mpa							52.7765									26	5	71.33	33.1597
																	7	68.6511	39.0471
时间	泵位	入口压力/MPa	出口压力/MPa	回压/MPa	围压/MPa	电阻/Ω	电阻率/Ω·m			m1	m2	Vg	气液比				7.5	67.0996	39.2661
13:53:59	217.188	20.2	20.23	19.45	23.1	30747	49.2217			18.042	20.093	82	39.9805				12	66.5098	40.3684
13:54:59	216.988	20.2	20.23	19.45	23.1	30703.8	49.1526			17.697	19.686	85	42.735				20	57.6938	41.8672
13:55:59	216.788	20.2	20.23	19.45	23.1	30673.2	49.1036			18.042	20.272	92	41.2556			31	5	61.3314	29.6721
13:56:59	216.588	20.2	20.23	19.45	23.1	30634.7	49.0419			17.697	19.828	88	41.2952				7	57.3082	36.6122
13:57:59	216.388	20.2	20.23	19.45	23.1	30605.6	48.9954						41.3166				7.5	56.6087	36.6547
13:58:59	216.188	20.2	20.23	19.45	23.1	30574.5	48.9456										12	52.7765	37.5918
13:59:59	215.988	20.2	20.23	19.45	23.1	30553.3	48.9116										20	48.9813	41.3166
14:00:59	215.788	20.2	20.23	19.45	23.1	30547.2	48.9019									35	5	52.0472	27.3438
14:01:59	215.588	20.2	20.23	19.45	23.1	30470	48.7783										7	47.5187	30.905
14:02:59	215.388	20.2	20.23	19.45	23.1	30459.2	48.761										7.5	47.1708	34.2408
							48.9813										12	45.1588	35.9841
温度：35℃ 压力：5Mpa																	20	42.7568	40.6624
																50	5	49.1226	21.4799
时间	泵位	入口压力/MPa	出口压力/MPa	回压/MPa	围压/MPa	电阻/Ω	电阻率/Ω·m			m1	m2	Vg	气液比				7	41.6583	25.0389
16:19:59	281.581	5.05	5.04	4.5	8.06	32504.2	52.0347			18.042	21.286	88	27.127				7.5	39.1705	26.3406
16:20:59	281.381	5.05	5.04	4.5	8.06	32543.1	52.097			17.697	20.809	84	26.9923				12	35.1786	31.5194
16:21:59	281.181	5.05	5.04	4.5	8.06	32512.8	52.0485			18.042	21.768	104	27.912				20	32.6676	35.8213
16:22:59	280.981	5.05	5.04	4.5	8.06	32543.1	52.097						27.3438			70	5	43.0689	16.3671
16:23:59	280.781	5.05	5.04	4.5	8.06	32532.9	52.0807										7	27.6548	20.2233
16:24:59	280.581	5.05	5.04	4.5	8.06	32516.9	52.0551										7.5	26.8405	21.8119
16:25:59	280.381	5.05	5.04	4.5	8.06	32510.5	52.0448										12	22.608	27.3142
16:26:59	280.181	5.05	5.04	4.5	8.06	32506.5	52.0384										20	21.23	31.24
16:27:59	279.981	5.05	5.04	4.5	8.06	32452.9	51.9526
16:28:59	279.781	5.05	5.04	4.5	8.06	32497.1	52.0234
温度：35℃ 压力：7Mpa							52.0472
时间	泵位	入口压力/MPa	出口压力/MPa	回压/MPa	围压/MPa	电阻/Ω	电阻率/Ω·m			m1	m2	Vg	气液比
17:00:59	200.734	7.09	7.07	6.5	10.06	29629	47.4319			18.042	20.882	86	30.2817
17:01:59	200.534	7.09	7.07	6.5	10.06	29611.9	47.4046			17.697	20.413	86	31.6642
17:02:59	200.334	7.09	7.07	6.5	10.06	29635.7	47.4427			18.042	20.902	88	30.7692
17:03:59	200.134	7.09	7.07	6.5	10.06	29689.8	47.5293						30.905
17:04:59	199.934	7.09	7.07	6.5	10.06	29701.1	47.5474
17:05:59	199.734	7.09	7.07	6.5	10.06	29675.1	47.5057
17:06:59	199.534	7.09	7.07	6.5	10.06	29721.4	47.5799
17:07:59	199.334	7.09	7.07	6.5	10.06	29728.8	47.5917									过co2去离子电阻		改数据					去离子水气液比
17:08:59	199.134	7.09	7.07	6.5	10.06	29738.5	47.6072									5	71.33	61.33	57.05	45.298	30.295		5	33.2	29.7	27.3438	21.4799	16.367
17:09:59	198.934	7.09	7.07	6.5	10.06	29700.5	47.5464									7	68.65	57.31	52.52	40.66	27.65		7	39	36.6	32.905	25.0389	20.2233
温度：35℃ 压力：7.5Mpa							47.5187									7.5	67.1	56.61	51.029	39.17	26.84		7.5	39.3	36.7	34.2408	26.3406	21.8119
																12	63.234	52.78	48.16	35.18	22.61		12	40.4	38.6	35.9841	31.5194	27.3142
时间	泵位	入口压力/MPa	出口压力/MPa	回压/MPa	围压/MPa	电阻/Ω	电阻率/Ω·m			m1	m2	Vg	气液比			20	57.69	48.98	43.76	32.67	21.23		20	42.9	41.3	39.6624	35.8213	31.24
18:33:59	149.381	7.53	7.5	7.3	10.53	29452.2	47.1489			18.042	20.705	92	34.5475
18:34:59	149.181	7.53	7.5	7.3	10.53	29469.5	47.1766			17.697	20.1	82	34.124
18:35:59	148.981	7.53	7.5	7.3	10.53	29493.4	47.2149			17.697	20.81	106	34.0508			过co2地层水电阻		编					地层水气液比
18:36:59	148.781	7.53	7.5	7.3	10.53	29492.6	47.2136						34.2408			5	58.67	50.33	46.08	33.998	19.994		5	26.2	24.7	22.3438	16.4799	8.36705
18:37:59	148.581	7.53	7.5	7.3	10.53	29460.9	47.1628									7	56.44	47.98	42.54	30.225	17.62		7	32.243	31.1	28.905	20.0389	12.7233
18:38:59	148.381	7.53	7.5	7.3	10.53	29489.9	47.2093									7.5	55.62	46.71	41.03	29.713	16.84		7.5	33.3	31.7	29.2408	21.3406	13.8119
18:39:59	148.181	7.53	7.5	7.3	10.53	29476	47.187									12	52.668	42.68	37.24	25.689	12.661		12	34.46	32.9	30.9841	26.5194	20.3142
18:40:59	147.981	7.53	7.5	7.3	10.53	29464.9	47.1692									20	46.79	38.97	33.78	22.676	9.24		20	36.9	35.3	33.6624	29.8213	22.24
18:41:59	147.781	7.53	7.5	7.3	10.53	29454.2	47.1521
18:42:59	147.581	7.53	7.5	7.3	10.53	29405.3	47.0738
温度：35℃ 压力：12Mpa							47.1708
时间	泵位	入口压力/MPa	出口压力/MPa	回压/MPa	围压/MPa	电阻/Ω	电阻率/Ω·m			m1	m2	Vg	气液比
19:29:59	97.375	12.01	12.02	11.7	15.04	28279.4	45.2714			18.042	20.379	84	35.9435
19:30:59	97.175	12.01	12.02	11.7	15.04	28243.2	45.2135			17.697	20.037	85	36.3248
19:31:59	96.975	12.01	12.02	11.7	15.04	28235.2	45.2007			17.697	20.051	84	35.6839
19:32:59	96.775	12.01	12.02	11.7	15.04	28259.2	45.2391						35.9841
19:33:59	96.575	12.01	12.02	11.7	15.04	28238.5	45.2059
19:34:59	96.375	12.01	12.02	11.7	15.04	28226.5	45.1867
19:35:59	96.175	12.01	12.02	11.7	15.04	28213.4	45.1658
19:36:59	95.975	12.01	12.02	11.7	15.04	28147.8	45.0608
19:37:59	95.775	12.01	12.02	11.7	15.04	28130.8	45.0335
19:38:59	95.575	12.01	12.02	11.7	15.04	28116.5	45.0106
温度：35℃ 压力：20Mpa							45.1588
时间	泵位	入口压力/MPa	出口压力/MPa	回压/MPa	围压/MPa	电阻/Ω	电阻率/Ω·m			m1	m2	Vg	气液比
20:57:59	47.154	20.09	20.14	19.6	23.11	26640.9	42.6484			18.042	20.074	82	40.3543
20:58:59	46.954	20.09	20.14	19.6	23.11	26860.5	43			17.697	19.757	84	40.7767
20:59:59	46.754	20.09	20.14	19.6	23.11	26613	42.6037			18.042	20.098	84	40.856
21:00:59	46.554	20.09	20.14	19.6	23.11	26643.7	42.6529						40.6624
21:01:59	46.354	20.09	20.14	19.6	23.11	26668.6	42.6928
21:02:59	46.154	20.09	20.14	19.6	23.11	27108.6	43.3971
21:03:59	45.954	20.09	20.14	19.6	23.11	26635.8	42.6402
21:04:59	45.754	20.09	20.14	19.6	23.11	26699	42.7414
21:05:59	45.554	20.09	20.14	19.6	23.11	26602	42.5861
21:06:59	45.354	20.09	20.12	19.45	23.06	26614.2	42.6057
							42.7568
温度：50℃ 压力：5Mpa
时间	泵位	入口压力/MPa	出口压力/MPa	回压/MPa	围压/MPa	电阻/Ω	电阻率/Ω·m			m1	m2	Vg	气液比
09:07:59	167.406	5.06	5.05	4.6	8.14	30793.2	49.2957			18.042	21.799	86	22.8906
09:08:59	167.206	5.06	5.05	4.6	8.14	30782.1	49.2779			17.697	22.452	102	21.4511
09:09:59	167.006	5.06	5.05	4.6	8.14	30756.3	49.2366			18.042	23.053	104	20.7543
09:10:59	166.806	5.06	5.05	4.6	8.14	30696.4	49.1407			17.697	21.923	88	20.8235
09:11:59	166.606	5.06	5.05	4.6	8.14	30713.7	49.1684						21.4799
09:12:59	166.406	5.06	5.05	4.6	8.14	30703.8	49.1526
09:13:59	166.206	5.06	5.05	4.6	8.14	30670	49.0984
09:14:59	166.006	5.06	5.05	4.6	8.14	30619.6	49.0178
09:15:59	165.806	5.06	5.05	4.6	8.14	30565.8	48.9316
09:16:59	165.606	5.06	5.05	4.6	8.14	30549.7	48.9059
温度：50℃ 压力：7Mpa							49.1226
时间	泵位	入口压力/MPa	出口压力/MPa	回压/MPa	围压/MPa	电阻/Ω	电阻率/Ω·m			m1	m2	Vg	气液比
09:55:59	297.363	7.04	7.02	6.7	10.03	25991.6	41.609			18.042	21.404	84	24.9851
09:56:59	297.163	7.04	7.02	6.7	10.03	26012.6	41.6426			17.697	21.318	90	24.855
09:57:59	296.963	7.04	7.02	6.7	10.03	26013.1	41.6434			18.042	21.207	80	25.2765
09:58:59	296.763	7.04	7.02	6.7	10.03	26005.5	41.6312						25.0389
09:59:59	296.563	7.04	7.02	6.7	10.03	26004.6	41.6298
10:00:59	296.363	7.04	7.02	6.7	10.03	26034.7	41.678
10:01:59	296.163	7.04	7.02	6.7	10.03	26035.6	41.6794
10:02:59	295.963	7.04	7.02	6.7	10.03	26049.1	41.701
10:03:59	295.763	7.04	7.02	6.7	10.03	26044.3	41.6933
10:04:59	295.563	7.04	7.02	6.7	10.03	26033.3	41.6757
温度：50℃ 压力：7.5Mpa							41.6583
时间	泵位	入口压力/MPa	出口压力/MPa	回压/MPa	围压/MPa	电阻/Ω	电阻率/Ω·m			m1	m2	Vg	气液比
10:53:59	418.291	7.59	7.58	7.2	10.59	24618.3	39.4105			18.042	21.5	86	24.8699
10:54:59	418.091	7.59	7.58	7.2	10.59	24589.4	39.3642			17.697	20.988	87	26.4357
10:55:59	417.891	7.59	7.58	7.2	10.59	24551.6	39.3037			18.042	21.198	84	26.616
10:56:59	417.691	7.59	7.58	7.2	10.59	24551	39.3028			17.697	20.831	86	27.441
10:57:59	417.491	7.59	7.58	7.2	10.59	24531.7	39.2719						26.3406
10:58:59	417.291	7.59	7.58	7.2	10.59	24468.3	39.1704
10:59:59	417.091	7.59	7.58	7.2	10.59	24408.5	39.0746
11:00:59	416.891	7.59	7.58	7.2	10.59	24376	39.0226
11:01:59	416.691	7.59	7.58	7.2	10.59	24305.6	38.9099
11:02:59	416.491	7.59	7.58	7.2	10.59	24283.5	38.8745
温度：50℃ 压力：12Mpa							39.1705
时间	泵位	入口压力/MPa	出口压力/MPa	回压/MPa	围压/MPa	电阻/Ω	电阻率/Ω·m			m1	m2	Vg	气液比
11:55:59	351.442	12.1	12.11	11.45	15.08	22272.1	35.6546			18.042	20.879	84	29.6087
11:56:59	351.242	12.1	12.11	11.45	15.08	22211.8	35.558			17.697	20.311	85	32.5172
11:57:59	351.042	12.1	12.11	11.45	15.08	21986.2	35.1969			18.042	20.661	82	31.3097
11:58:59	350.842	12.1	12.11	11.45	15.08	21977.8	35.1834			17.697	20.301	85	32.6421
11:59:59	350.642	12.1	12.11	11.45	15.08	21759.5	34.834						31.5194
12:00:59	350.442	12.1	12.11	11.45	15.08	21751.8	34.8216
12:01:59	350.242	12.1	12.11	11.45	15.08	21866.9	35.0059
12:02:59	350.042	12.1	12.11	11.45	15.08	21948.8	35.137
12:03:59	349.842	12.1	12.11	11.45	15.08	21982.9	35.1916
12:04:59	349.642	12.1	12.11	11.45	15.08	21990.3	35.2034
温度：50℃ 压力：20Mpa							35.1786
时间	泵位	入口压力/MPa	出口压力/MPa	回压/MPa	围压/MPa	电阻/Ω	电阻率/Ω·m			m1	m2	Vg	气液比
13:17:59	122.802	20.18	20.19	19.5	23.1	20246.9	32.4125			18.042	20.32	84	36.8745
13:18:59	122.602	20.18	20.19	19.5	23.1	20296	32.4911			17.697	20.134	88	36.11
13:19:59	122.402	20.18	20.19	19.5	23.1	20321.4	32.5318			18.042	20.589	89	34.9431
13:20:59	122.202	20.18	20.19	19.5	23.1	20336.8	32.5564			17.697	20.101	85	35.3577
13:21:59	122.002	20.18	20.19	19.5	23.1	20367.8	32.606						35.8213
13:22:59	121.802	20.18	20.19	19.5	23.1	20391.7	32.6443
13:23:59	121.602	20.18	20.19	19.5	23.1	20378.6	32.6233
13:24:59	121.402	20.18	20.19	19.5	23.1	20426.5	32.7
13:25:59	121.202	20.18	20.19	19.5	23.1	20468.2	32.7668
13:26:59	121.002	20.18	20.19	19.5	23.1	20828.6	33.3437
温度：70℃ 压力：5Mpa							32.6676
时间	泵位	入口压力/MPa	出口压力/MPa	回压/MPa	围压/MPa	电阻/Ω	电阻率/Ω·m			m1	m2	Vg	气液比
16:34:59	461.301	5.11	5.09	4.5	8.1	26475.9	42.3843			18.042	22.98	84	17.0109
16:35:59	461.101	5.11	5.09	4.5	8.1	26391.9	42.2498			17.697	23.096	88	16.2993
16:36:59	460.901	5.11	5.09	4.5	8.1	26560.1	42.5191			18.042	23.398	86	16.0568
16:37:59	460.701	5.11	5.09	4.5	8.1	26547.5	42.4989			17.697	22.914	84	16.1012
16:38:59	460.501	5.11	5.09	4.5	8.1	26470.3	42.3753						16.3671
16:39:59	460.301	5.11	5.09	4.5	8.1	26703.3	42.7483
16:40:59	460.101	5.11	5.09	4.5	8.1	27096.5	43.3778
16:41:59	459.901	5.11	5.09	4.5	8.1	27599.8	44.1835
16:42:59	459.701	5.11	5.09	4.5	8.1	27602.1	44.1872
16:43:59	459.501	5.11	5.09	4.5	8.1	27588.3	44.1651
温度：70℃ 压力：7Mpa							43.0689
时间	泵位	入口压力/MPa	出口压力/MPa	回压/MPa	围压/MPa	电阻/Ω	电阻率/Ω·m			m1	m2	Vg	气液比
15:02:59	329.232	7.05	7.03	6.7	10.02	17411.8	27.8739			18.042	22.112	82	20.1474
15:03:59	329.032	7.05	7.03	6.7	10.02	17362.5	27.795			17.697	21.687	82	20.5514
15:04:59	328.832	7.05	7.03	6.7	10.02	17315.3	27.7194			18.042	22.198	83	19.9711
15:05:59	328.632	7.05	7.03	6.7	10.02	17278.1	27.6599						20.2233
15:06:59	328.432	7.05	7.03	6.7	10.02	17356.3	27.785
15:07:59	328.232	7.05	7.03	6.7	10.02	17273	27.6517
15:08:59	328.032	7.05	7.03	6.7	10.02	17222	27.5701
15:09:59	327.832	7.05	7.03	6.7	10.02	17168.6	27.4846
15:10:59	327.632	7.05	7.03	6.7	10.02	17158.1	27.4678
15:11:59	327.432	7.05	7.03	6.7	10.02	17204	27.5412
温度：70℃ 压力：7.5Mpa							27.6548
时间	泵位	入口压力/MPa	出口压力/MPa	回压/MPa	围压/MPa	电阻/Ω	电阻率/Ω·m			m1	m2	Vg	气液比
19:39:59	328.03	7.62	7.6	7	10.58	16742.1	26.8018			18.042	21.994	88	22.2672
19:40:59	327.83	7.62	7.6	7	10.58	16784.6	26.8698			17.697	21.792	88	21.4896
19:41:59	327.63	7.62	7.6	7	10.58	16770.4	26.8471			18.042	22.009	86	21.6789
19:42:59	327.43	7.62	7.6	7	10.58	16755.8	26.8237						21.8119
19:43:59	327.23	7.62	7.6	7	10.58	16757.6	26.8266
19:44:59	327.03	7.62	7.6	7	10.58	16757.3	26.8261
19:45:59	326.83	7.62	7.6	7	10.58	16762.7	26.8348
19:46:59	326.63	7.62	7.6	7	10.58	16784.1	26.869
19:47:59	326.43	7.62	7.6	7	10.58	16758.8	26.8285
19:48:59	326.23	7.62	7.6	7	10.58	16789.2	26.8772
温度：70℃ 压力：12Mpa							26.8405
时间	泵位	入口压力/MPa	出口压力/MPa	回压/MPa	围压/MPa	电阻/Ω	电阻率/Ω·m			m1	m2	Vg	气液比
20:55:59	248.6	12.19	12.18	11.5	15.07	14127.3	22.6159			18.042	21.308	90	27.5566
20:56:59	248.4	12.19	12.18	11.5	15.07	14144.4	22.6432			17.697	21.146	94	27.2543
20:57:59	248.2	12.19	12.18	11.5	15.07	14147.2	22.6477			18.042	21.396	91	27.1318
20:58:59	248	12.19	12.18	11.5	15.07	14132.6	22.6243						27.3142
20:59:59	247.8	12.19	12.18	11.5	15.07	14125.8	22.6135
21:00:59	247.6	12.19	12.18	11.5	15.07	14094	22.5626
21:01:59	247.4	12.19	12.18	11.5	15.07	14109.2	22.5869
21:02:59	247.2	12.19	12.18	11.5	15.07	14122.1	22.6075
21:03:59	247	12.19	12.18	11.5	15.07	14103.7	22.5781
21:04:59	246.8	12.19	12.18	11.5	15.07	14117.5	22.6002
温度：70℃ 压力：20Mpa							22.608
时间	泵位	入口压力/MPa	出口压力/MPa	回压/MPa	围压/MPa	电阻/Ω	电阻率/Ω·m			m1	m2	Vg	气液比
18:55:59	469.124	20.11	20.12	19.7	23.1	25909	41.4767			17.836	21.439	110	30.5301
18:56:59	468.924	20.11	20.12	19.7	23.1	25895.5	41.4551			18.039	21.423	106	31.3239
18:57:59	468.724	20.11	20.12	19.7	23.1	25901.9	41.4654			17.836	21.228	106	31.25
18:58:59	468.524	20.11	20.12	19.7	23.1	25859.6	41.3977						31.0347
18:59:59	468.324	20.11	20.12	19.7	23.1	25846.3	41.3764
19:00:59	468.124	20.11	20.12	19.7	23.1	25855.9	41.3917
19:01:59	467.924	20.11	20.12	19.7	23.1	25848.2	41.3794
19:02:59	467.724	20.11	20.12	19.7	23.1	25836.4	41.3605
19:03:59	467.524	20.11	20.12	19.7	23.1	25791.8	41.2891
19:04:59	467.324	20.11	20.12	19.7	23.1	25807.2	41.3138
							41.3906

## Sheet: 画图数据
Resistivity of Deionized Water				Formation Water Resistivity				Resistivity of Supersaturated CO2 in Deionized Water					Resistivity of Supersaturated CO2 in Formation Water					Solubility of CO2 in Deionized Water					Solubility of CO2 in Formation Water
温度	压力	电阻率		温度	压力	电阻率		温度	压力	电阻率			温度	压力	电阻率			26	5	33.2			26	5	26.2
26	5	950.68		26	5	11.0502		26	5	71.33			26	5	58.67				7	39				7	32.243
	7	941.79			7	10.9713			7	68.65				7	56.44				7.5	39.3				7.5	33.3
	7.5	932.11			7.5	10.9336			7.5	67.1				7.5	55.62				12	40.4				12	34.46
	12	929.46			12	10.8747			12	63.234				12	52.668				20	42.9				20	36.9
	20	925.23			20	10.6301			20	57.69				20	46.79			31	5	29.7			31	5	24.7
31	5	904.256		31	5	9.9591		31	5	61.33			31	5	50.33				7	36.6				7	31.1
	7	886.983			7	9.8484			7	57.31				7	47.98				7.5	36.7				7.5	31.7
	7.5	880.191			7.5	9.75			7.5	56.61				7.5	46.71				12	38.6				12	32.9
	12	870.36			12	9.6824			12	52.78				12	42.68				20	41.3				20	35.3
	20	848.117			20	9.551			20	48.98				20	38.97			35	5	27.3438			35	5	22.3438
35	5	882.989		35	5	9.32		35	5	57.05			35	5	46.08				7	32.905				7	28.905
	7	865.071			7	9.3192			7	52.52				7	42.54				7.5	34.2408				7.5	29.2408
	7.5	860.995			7.5	9.2903			7.5	51.029				7.5	41.03				12	35.9841				12	30.9841
	12	850.394			12	9.19			12	48.16				12	37.24				20	39.6624				20	33.6624
	20	823.029			20	8.9724			20	43.76				20	33.78			50	5	21.4799			50	5	16.4799
50	5	634.722		50	5	4.7775		50	5	45.298			50	5	33.998				7	25.0389				7	20.0389
	7	611.607			7	4.7221			7	40.66				7	30.225				7.5	26.3406				7.5	21.3406
	7.5	599.896			7.5	4.5657			7.5	39.17				7.5	29.713				12	31.5194				12	26.5194
	12	593.123			12	4.503			12	35.18				12	25.689				20	35.8213				20	29.8213
	20	589.565			20	4.4637			20	32.67				20	22.676			70	5	16.367			70	5	8.36705
70	5	426.575		70	5	4.011		70	5	30.295			70	5	19.994				7	20.2233				7	12.7233
	7	398.296			7	3.6558			7	27.65				7	17.62				7.5	21.8119				7.5	13.8119
	7.5	388.74			7.5	3.4899			7.5	26.84				7.5	16.84				12	27.3142				12	20.3142
	12	376.891			12	3.3995			12	22.61				12	12.661				20	31.24				20	22.24
	20	375.765			20	3.27			20	21.23				20	9.24
